# Supplementary material for: An Integrated Epigenomic and Genomic View on Phyllodes and Phyllodes-like Breast Tumors
Source: MDPI journal article supplement (doi:10.3390/cancers14030667), 2022-01-28

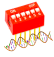

## NanoDiP Report for Sample B1992\_24268\_20211126\_BC12

Generated on : meqneuopat17 / 20211126\_143419  
Detected barcode : barcode12  
Valid reads : 142994  
450K overlap CpG count : 4488  
Reference data : AllIDATv2\_20210804

### Methylation UMAP plot

Close-up UMAP for B1992\_24268\_20211126\_BC12 against AllIDATv2\_20210804.xlsx,

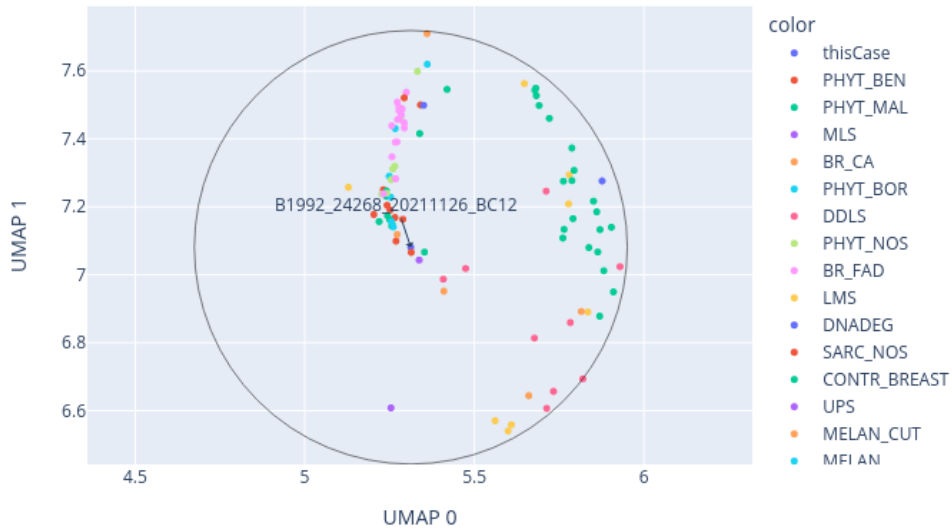

### Copy number plot

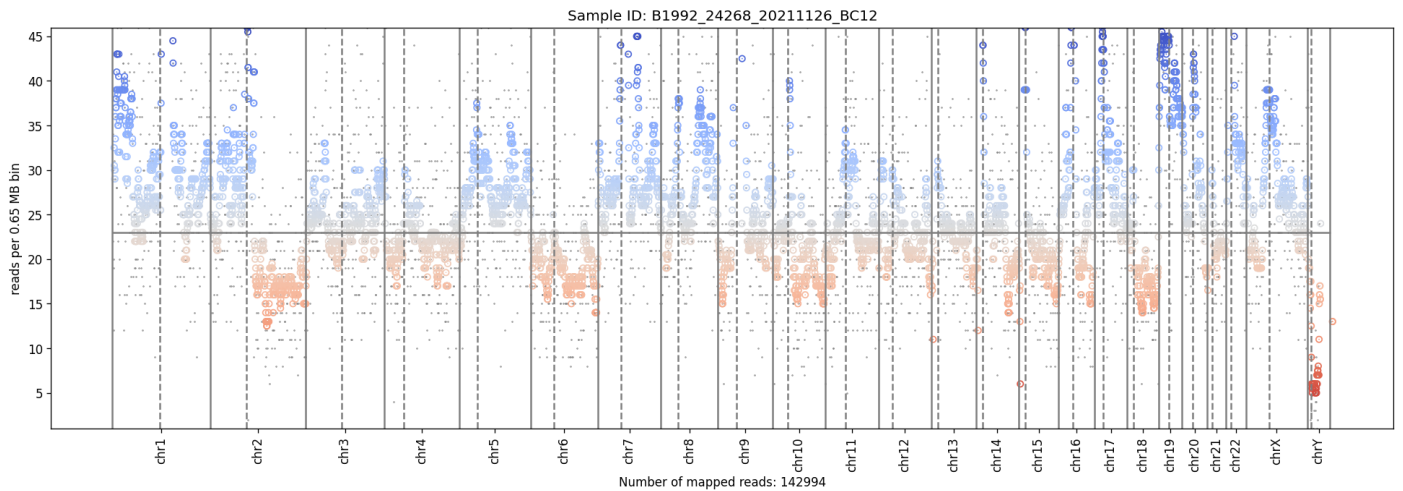

Supplement: s1 [file s1]
