# Supplementary figures and images for: An Integrated Epigenomic and Genomic View on Phyllodes and Phyllodes-like Breast Tumors
Source: MDPI journal article supplement (doi:10.3390/cancers14030667), 2022-01-28

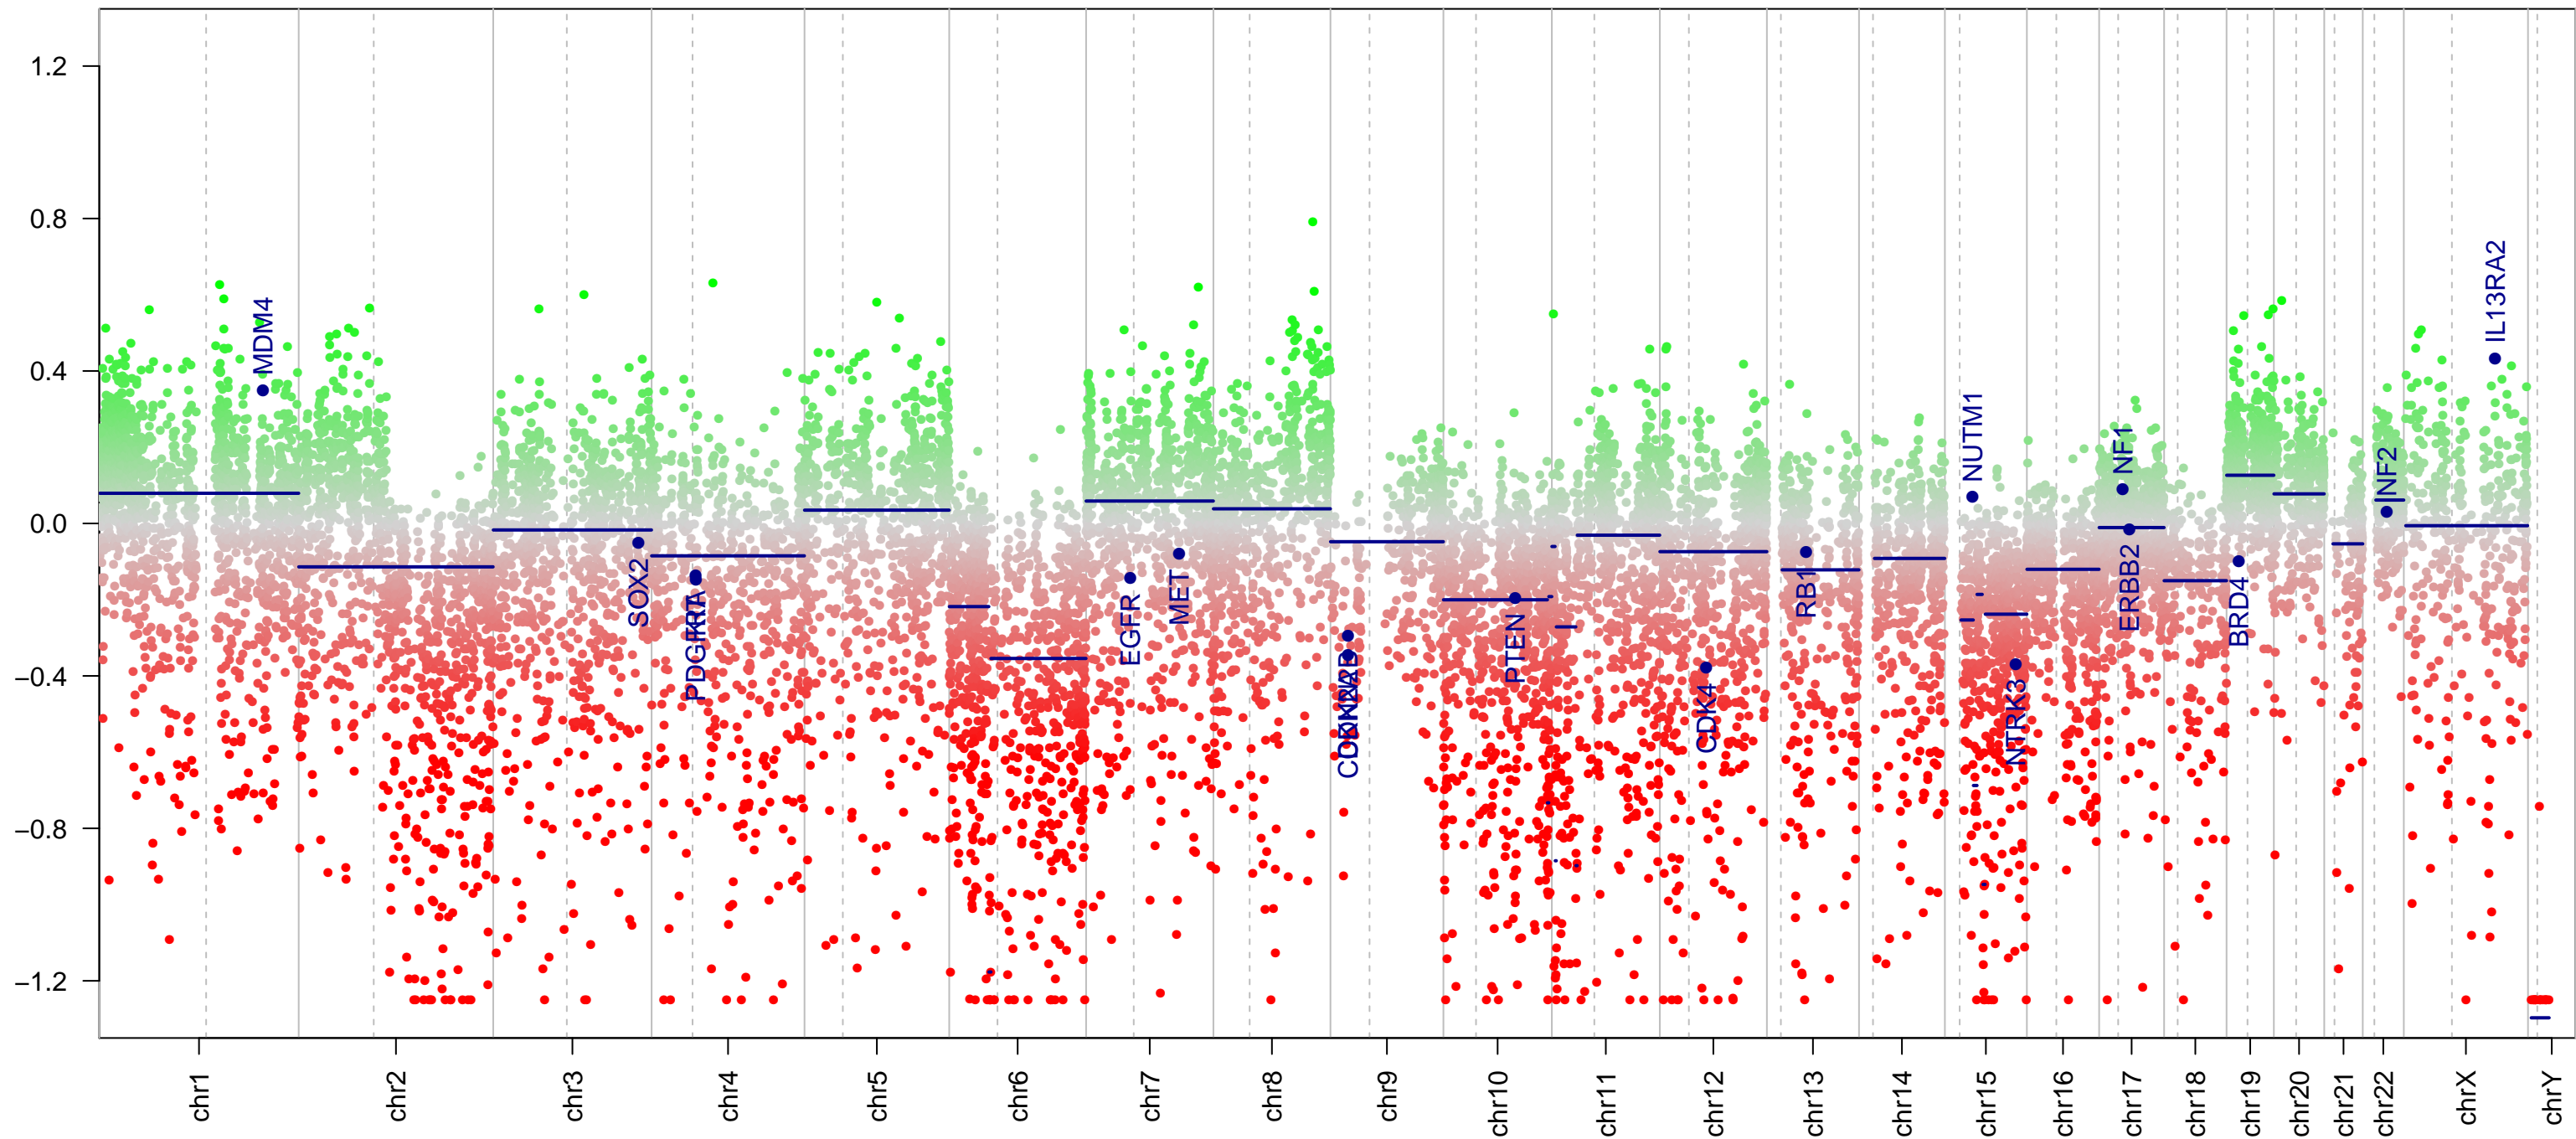

Supplement: s1 [file s1]
